## Subscription and Business Information

*The American Journal of Psychiatry*, ISSN 0002-953X, is published monthly by the American Psychiatric Association.

The American Psychiatric Association does not hold itself responsible for statements made in its publications by contributors or advertisers. Unless so stated, material in *The American Journal of Psychiatry* does not reflect the endorsement, official attitude, or position of the American Psychiatric Association or of the Journal's Editorial Board.

Periodicals postage paid at Washington, DC, and additional mailing offices. POSTMASTER: Send address changes to *The American Journal of Psychiatry*, Circulation Department, American Psychiatric Association, 800 Maine Avenue, S.W., Suite 900, Washington, D.C. 20024.

### Editorial Office

*American Journal of Psychiatry*  
American Psychiatric Association  
800 Maine Avenue, S.W., Suite 900  
Washington, D.C. 20024  
E-mail: [ajp@psych.org](mailto:ajp@psych.org)

### Customer Service

Phone: (800) 368-5777 (toll-free)  
E-mail: [appi@psych.org](mailto:appi@psych.org)

### APA Member Subscription Services

Phone: (888) 35-PSYCH (toll-free)

### Subscriptions

Regular and resident-fellow members in the U.S. receive print and online access as a **member benefit**. Subscriptions for non-members start at \$362 per year. Online only subscriptions start at \$327 per year. Go to <http://www.appi.org/products> for more information.

Institutional subscriptions are tier priced. For institutional site license or pricing information, contact (202) 559-3729 or [institutions@psych.org](mailto:institutions@psych.org).

*Additional subscription options, including single issues and student rates*  
Contact Customer Service

### Advertising

*Pharmaceutical Print and Online Advertising*  
Frank Cox, Kathleen Harrison, Tim Wolfinger  
Pharmaceutical Media, Inc.  
30 East 33rd Street  
New York, NY 10016  
Phone: (212) 904-0379  
E-mail: [twolfinger@pminy.com](mailto:twolfinger@pminy.com)

*Nonpharmaceutical and Online Sales*  
Eamon Wood  
Pharmaceutical Media, Inc.  
E-mail: [ewood@pminy.com](mailto:ewood@pminy.com)  
(see address and phone above).

### Permissions and Reprints

Material published in the journals of the American Psychiatric Association and American Psychiatric Association Publishing is protected by copyright and all rights are reserved. Material may not be reproduced in any form or by any means without written permission from the copyright owner. For permission to reproduce material published by APA, please visit <http://www.appi.org/customer-service/permissions> for more information. Permission can also be secured through the Copyright Clearance Center ([www.copyright.com](http://www.copyright.com)).

APA does not require that permission be obtained for the photocopying of isolated articles for nonprofit classroom or library reserve use; all fees associated with such permission are waived. This consent does not extend to other kinds of copying, such as copying for general distribution, for advertising or promotional purposes, for creating new collective works, or for resale. Requests for commercial distribution and bulk reprints should be directed to (202) 609-7075.

Indexed in Abstracts for Social Workers, Academic Abstracts, Biological Abstracts, Chemical Abstracts, Chicago Psychoanalytic Literature Index, Cumulative Index to Nursing Literature, Excerpta Medica, Hospital Literature Index, Index Medicus, International Nursing Index, Nutrition Abstracts, Psychological Abstracts, Science Citation Index, Social Science Source, and Social Sciences Index.

Pages are produced by KnowledgeWorks Global (Waterbury, VT) and printed by Sheridan NH (Hanover, NH) on acid-free paper effective with Volume 169, Number 1, January 2012.

© 2021 American Psychiatric Association.

# Improving the Lives We Touch

Acadia physicians are recognized thought leaders who help set the standard for clinical excellence while providing a vital service that improves lives, unites families, and strengthens communities.

## SPECIALTIES:

Inpatient | Residential | Specialty | PHP | IOP | Outpatient

For more information, please visit: [www.practicewithacadiahealth.com](http://www.practicewithacadiahealth.com)

## The American Journal of Psychotherapy

APA's journal of psychotherapy practice and research

Since 1947, the *American Journal of Psychotherapy* has provided a forum for advancing the theory, science, and clinical practice of psychotherapy, publishing articles that expand understanding of psychotherapies, especially in the domains of efficacy, process, education, and practice. The journal provides authors and readers the opportunity to engage fully in pressing psychotherapy issues such as defining core elements of psychotherapies, dissemination of evidence-based practices, scaling best practices for expansion to larger populations, understanding mechanisms of change, and evaluating best practices for psychotherapy training and supervision. From its new home as part of APA Publishing's portfolio of journals, the *American Journal of Psychotherapy* is the ideal vehicle to disseminate knowledge about psychotherapy and send a message that psychotherapy remains firmly within the purview of psychiatry.

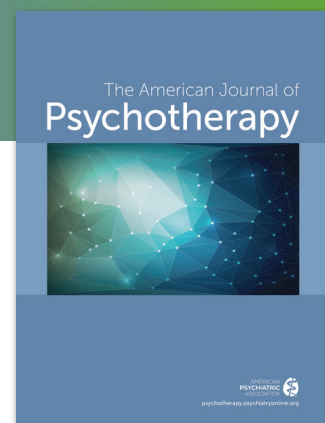

Holly A. Swartz, M.D., Editor-in-Chief

Frequency: Quarterly  
Online ISSN: 2575-6559  
[psychotherapy.psychiatryonline.org](http://psychotherapy.psychiatryonline.org)

➤ To receive updates on new content, follow the journal on Twitter (@APAPubJournals) and sign up for free publication alerts at [psychiatryonline.org](http://psychiatryonline.org)

➤ To see more from the journal, including its entire 70+-year archive or to get information about submitting a paper, visit [www.psychotherapy.psychiatryonline.org](http://www.psychotherapy.psychiatryonline.org)

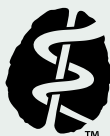

## Officers 2020–2021

### President

Jeffrey L. Geller, M.D., M.P.H.

### President-Elect

Vivian B. Pender, M.D.

### Treasurer

Richard F. Summers, M.D.

### Secretary

Sandra M. DeJong, M.D., M.Sc.

### Assembly

#### Speaker

Joseph C. Napoli, M.D.

#### Speaker-Elect

Mary Jo Fitz-Gerald, M.D., M.B.A.

#### Recorder

Adam Nelson, M.D.

### Office of the CEO and Medical Director

#### CEO and Medical Director

Saul Levin, M.D., M.P.A., F.R.C.P.-E.

### Board of Trustees

Rahn Kennedy Bailey, M.D.

Jenny L. Boyer, M.D., Ph.D., J.D.

Kenneth Certa, M.D.

Anita S. Everett, M.D.

Ayana Jordan, M.D., Ph.D.

Glenn A. Martin, M.D.

Annette M. Matthews, M.D.

Michael Mensah, M.D., M.P.H.

Vivian B. Pender, M.D.

Eric M. Plakun, M.D.

Michele Reid, M.D.

Bruce J. Schwartz, M.D.

Altha J. Stewart, M.D.

Sanya Virani, M.D., M.P.H.

Cheryl D. Wills, M.D.

Melinda Young, M.D.

## Editorial Board

### Editor-in-Chief

Ned H. Kalin, M.D.

### Deputy Editors

Elisabeth Binder, M.D., Ph.D.

Kathleen T. Brady, M.D., Ph.D.

David A. Lewis, M.D.

Daniel S. Pine, M.D.

Carolyn Rodriguez, M.D., Ph.D.

Madhukar Trivedi, M.D.

### Associate Editors

Olusola Ajilore, M.D., Ph.D.

Huda Akil, Ph.D.

Melissa Arbuckle, M.D., Ph.D.

Eraka P.J. Bath, M.D.

Alan Brown, M.D., M.P.H.

Tyrone Cannon, Ph.D.

Karl Deisseroth, M.D., Ph.D.

Benjamin G. Druss, M.D., M.P.H.

Javier I. Escobar, M.D., M.Sc.

Julie L. Fudge, M.D.

Qiyong Gong, M.D., Ph.D.

Raquel E. Gur, M.D., Ph.D.

Helena Hansen, M.D., Ph.D.

David C. Henderson, M.D.

Yasmin Hurd, Ph.D.

Clinton D. Kilts, Ph.D.

Carlos López Jaramillo, M.D., M.Sc., Ph.D.

Joan L. Luby, M.D.

John C. Markowitz, M.D.

Helen S. Mayberg, M.D., F.R.C.P.C.

Terrie E. Moffitt, Ph.D.

Charles B. Nemeroff, M.D., Ph.D.

Roy Perlis, M.D.

Diego A. Pizzagalli, Ph.D.

Bryan L. Roth, M.D., Ph.D.

Alan F. Schatzberg, M.D.

Dikoma C. Shungu, Ph.D.

Anita Thapar, M.B.B.Ch., F.R.C.Psych.,  
Ph.D., F.Med.Sci.

Mauricio Tohen, M.D., Dr.PH., M.B.A.

Giulio Tononi, M.D., Ph.D.

Nim Tottenham, Ph.D.

John T. Walkup, M.D.

### Editors Emeriti

Nancy C. Andreasen, M.D., Ph.D.

Robert Freedman, M.D.

### Former Editors

Amariah Brigham, M.D., 1844–1849

T. Romeyn Beck, M.D., 1849–1854

John P. Gray, M.D., 1854–1886

G. Alder Blumer, M.D., 1886–1894

Richard Dewey, M.D., 1894–1897

Henry M. Hurd, M.D., 1897–1904

Edward N. Brush, M.D., 1904–1931

Clarence B. Farrar, M.D., 1931–1965

Francis J. Braceland, M.D., 1965–1978

John C. Nemiah, M.D., 1978–1993

### Editorial Staff

#### Executive Editor

Michael D. Roy

#### Senior Editor

John J. Guardiano, Ph.D.

#### Production Manager

Susan Westrate

#### Staff Editors

Angela Moore

#### Online Content Manager

Michael Pogachar

#### Editorial Support Services Manager

Heidi Koch-Bubel

#### Editorial Assistant

Linda LaCour

#### Editorial Assistant/Permissions

Coordinator

Efrem Tuquabo

#### Spanish Content Manager

Sergi Casals, M.A.

### Publisher

John McDuffie

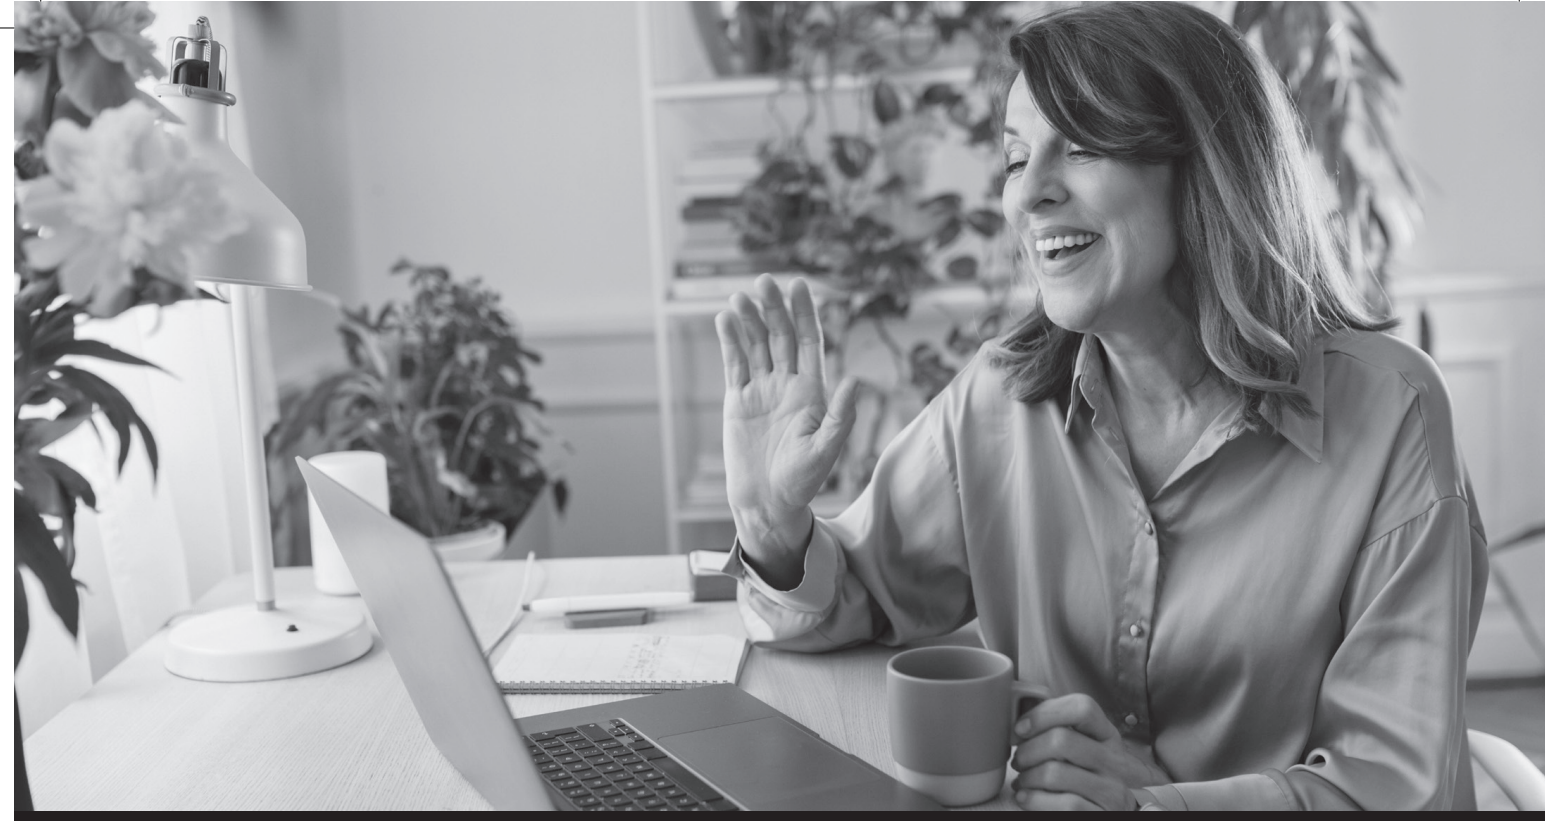

# We've Got You Covered

## American Psychiatric Association Endorsed Professional Liability Insurance Program

Designed for Psychiatrists in all practice settings

**DID YOU KNOW? We find that our policyholders are more likely to receive a board complaint than be named in a claim or lawsuit.**

Most insurance policies provided by employers do not include reimbursement for costs incurred to defend a complaint (or have limits that may be shared with others).

Not to worry... we include up to \$50,000 of defense reimbursement – with the option to increase this limit to \$150,000.

What's more, coverage for **Telepsychiatry** is provided, subject to the terms and conditions of the policy.

Cyber Coverage is available as an endorsement at renewal or on a new American Professional Agency policy. Available in most states on an admitted basis.

*(All discounts, coverage features and rating are subject to individual state approval.)*

Visit us at [apamalpractice.com](http://apamalpractice.com) or call **877-740-1777** to learn more.

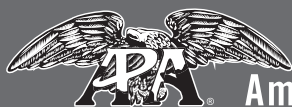

**American Professional Agency**

LEADERS IN PSYCHIATRIC MEDICAL LIABILITY INSURANCE

AMERICAN  
PSYCHIATRIC  
ASSOCIATION

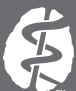

# THE AMERICAN PSYCHIATRIC ASSOCIATION

800 Maine Avenue, S.W., Suite 900, Washington, D.C. 20024

(888) 357-7924 (toll-free inside the U.S. and Canada)

web site: [www.psychiatry.org](http://www.psychiatry.org) • e-mail: [apa@psych.org](mailto:apa@psych.org)

## Chairpersons of Councils, Committees, and Task Forces

### Standing Committees

|                             |                                   |
|-----------------------------|-----------------------------------|
| <b>Bylaws</b>               | Kimberly D. Nordstrom, M.D., J.D. |
| <b>Elections</b>            | Justin W. Schoen, M.D.            |
| <b>Ethics</b>               | Rebecca W. Brendel, M.D., J.D.    |
| <b>Finance and Budget</b>   | Ann T. Sullivan, M.D.             |
| <i>Audit</i>                | Ayana Jordan, M.D., Ph.D.         |
| <i>Investment Oversight</i> | Steven S. Sharfstein, M.D.        |
| <b>Joint Reference</b>      | Vivian Pender, M.D.               |
| <b>Membership</b>           | Eric R. Williams, M.D.            |
| <b>Nominating</b>           | Bruce J. Schwartz, M.D.           |
| <b>Tellers</b>              | John A. Talbott, M.D.             |

### Non-Standing Committee

|                             |                               |
|-----------------------------|-------------------------------|
| <b>Conflict of Interest</b> | Sandra M. DeJong, M.D., M.Sc. |
|-----------------------------|-------------------------------|

### Councils

#### Council on Addiction Psychiatry

Jill Williams, M.D.

#### Council on Advocacy and Government Relations

Katherine G. Kennedy, M.D.

*Advocacy and Litigation Funding*

Bhasker J. Dave, M.D.

#### Council on Children, Adolescents, and Their Families

Gabrielle Shapiro, M.D.

*Women's Mental Health*

Ludmila B. De Faria, M.D.

#### Council on Communications

Isabel K. Norian, M.D.

#### Council on Consultation-Liaison Psychiatry

Sejal B. Shah, M.D.

#### Council on Geriatric Psychiatry

Robert P. Roca, M.D.

#### Council on Healthcare Systems and Financing

Robert L. Trestman, M.D., Ph.D.

*Integrated Care*

Henry Chung, M.D.

*RBRVS, Codes and Reimbursement*

Gregory G. Harris, M.D.

*Reimbursement for Psychiatric Care*

Laurence H. Miller, M.D.

*Telepsychiatry*

James H. Shore, M.D.

#### Council on International Psychiatry and Global Health

David C. Henderson, M.D.

*Chester Pierce Human Rights Award Committee*

[Pending]

#### Council on Medical Education and Lifelong Learning

Eindra Khin Khin, M.D.

*Innovation*

Nina Vasani, M.D.

*Scientific Program*

Jacqueline M. Feldman, M.D.

*Scientific Program-IPS (Oct. to Oct. tenure)*

[Pending]

*Vestermark Award Committee*

Joseph A. Cheong, M.D.

*Well-being and Burnout*

Batool Kazim, M.D.

#### Council on Minority Mental Health and Health Disparities

Eric Yarbrough, M.D.

#### Council on Psychiatry and Law

Debra A. Pinals, M.D.

*Judicial Action*

Reena Kapoor, M.D.

#### Council on Quality Care

Grayson S. Norquist, M.D.

*Mental Health Information Technology*

John Torous, M.D.

*Quality and Performance Measurement*

Carol Alter, M.D.

*Practice Guidelines*

Daniel J. Anzia, M.D.

#### Council on Research

Jonathan E. Alpert, M.D., Ph.D.

*Psychiatric Dimensions of Disasters*

Joshua C. Morganstein, M.D.

# See and Hear What the Field is Discussing

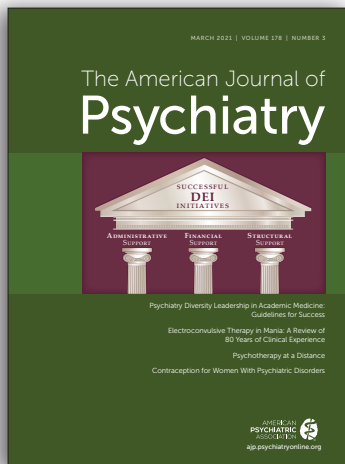

*The American Journal of Psychiatry* is committed to keeping the field of psychiatry vibrant and relevant by publishing the latest advances in the diagnosis and treatment of mental illness. Here are some of the most discussed articles that AJP has published so far in 2021 according to Altmeter, which monitors the online mentions and shares of research through daily tracking of 2,000 mainstream media outlets, Wikipedia, citations, social media, and more than 9,000 academic and nonacademic blogs.

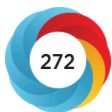

## A Randomized Controlled Trial of Repeated Ketamine Administration for Chronic Posttraumatic Stress Disorder

February 2021 issue

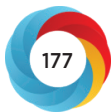

## Subjective Responses to Alcohol in the Development and Maintenance of Alcohol Use Disorder

January 5, 2021

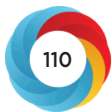

## Psychiatry Diversity Leadership in Academic Medicine: Guidelines for Success

March 2021 issue

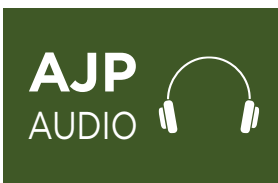

## Dive Deeper With AJP Audio

Each episode of the **AJP Audio** podcast brings you an in-depth look at one of the articles featured in that month's issue of *The American Journal of Psychiatry*. Wide-ranging interviews with article authors cover the background, rationale, main findings, and future implications of the research.

- **March 2021: Psychiatry Diversity Leadership in Academic Medicine**

Lead author Ayana Jordan, M.D., Ph.D., and senior author Christina Mangurian, M.D., M.A.S., go more in depth on their article, what led to it, and what comes next.

- **April 2021: Reducing Adolescent Psychopathology in Socioeconomically Disadvantaged Children**

Karen L. Bierman, Ph.D., discusses how enriching Head Start programs with an evidence-based social-emotional learning program substantially improved subsequent adolescent emotional and behavioral health outcomes

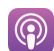

Apple Podcasts

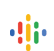

Google Podcasts

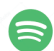

Spotify

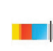

STITCHER

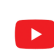

YouTube

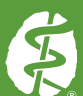

# Go Online

Visit [ajp.psychiatryonline.org](http://ajp.psychiatryonline.org) for these features!

**AJP in Advance** *Discover the latest research advances before they appear in print*

## The Prehistory of Psychiatric Genetics: 1780–1910

The views of our forebears in psychiatry on inherited transmission of mental illness, based largely on clinical observation and family histories, can usefully complement our views today on key issues in the field.

**AJP CME** *Earn CME credit: 3 courses per issue*

You can earn CME credits by reading articles in *The American Journal of Psychiatry*. Three articles in this issue form a short course that consists of reading the article and answering three multiple-choice questions with a single correct answer for up to 1 *AMA PRA Category 1 Credit™* each. Credit is issued only to subscribers of the online AJP CME Course Program.

See the table below for the articles in this month's issue that are the subject of a CME quiz.

**AJP Multimedia** *Access audio and video for highlights of each issue*

In **AJP Audio** each month, Executive Editor Michael Roy speaks with the author(s) of an article about the results of their research. In addition, Deputy Editor Daniel S. Pine, M.D., summarizes one or two articles in an **Issue Highlights** video. The table below lists the articles included in this month's audio podcast and video.

| In this issue                                                                                                                                                      | CME | Podcast | Video |
|--------------------------------------------------------------------------------------------------------------------------------------------------------------------|-----|---------|-------|
| Quality of Outpatient Depression Treatment in Patients With Comorbid Substance Use Disorder (p. 414)                                                               | ✓   | ✓       |       |
| Maintenance Treatment With Long-Acting Injectable Antipsychotics for People With Nonaffective Psychoses: A Network Meta-Analysis (p. 424)                          | ✓   |         |       |
| Impact of the KCNQ2/3 Channel Opener Ezogabine on Reward Circuit Activity and Clinical Symptoms in Depression: Results From a Randomized Controlled Trial (p. 437) |     |         | ✓     |
| Moderation of Prazosin's Efficacy by Alcohol Withdrawal Symptoms (p. 447)                                                                                          | ✓   |         |       |
| Effect of Experimental Manipulation of the Orbitofrontal Cortex on Short-Term Markers of Compulsive Behavior: A Theta Burst Stimulation Study (p. 459)             |     |         | ✓     |

**History of Psychiatry** *Revisit the field's rich history through the AJP Archive*

## 75 years ago this month: Problems Confronting Psychiatry in the Army Convalescent Hospital

Brigadier General William C. Menninger, co-founder of the clinic that bears the family name, discusses a presentation by a member of the Operations Service of the Surgeon General's Office that outlined the neuropsychiatric problems of the Army (and which appeared in the same issue). Menninger outlines how these problems the Army faced at war's onset were addressed over the course of the conflict, concluding "we in psychiatry have had a closer, happier relationship with all other specialties of medicine than in any situation in civilian life. There is not a general medical officer in the Army who has not had more exposure to psychiatric problems in his Army career than he did in all the rest of his medical career put together. We only hope that he and his future patients will profit from it."

@APAPubJournals

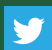

Psychiatry Online

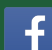

AMERICAN  
PSYCHIATRIC  
ASSOCIATION  
PUBLISHING

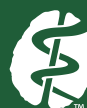

www.appi.org  
1-800-368-5777  
appi@psych.org

# Live

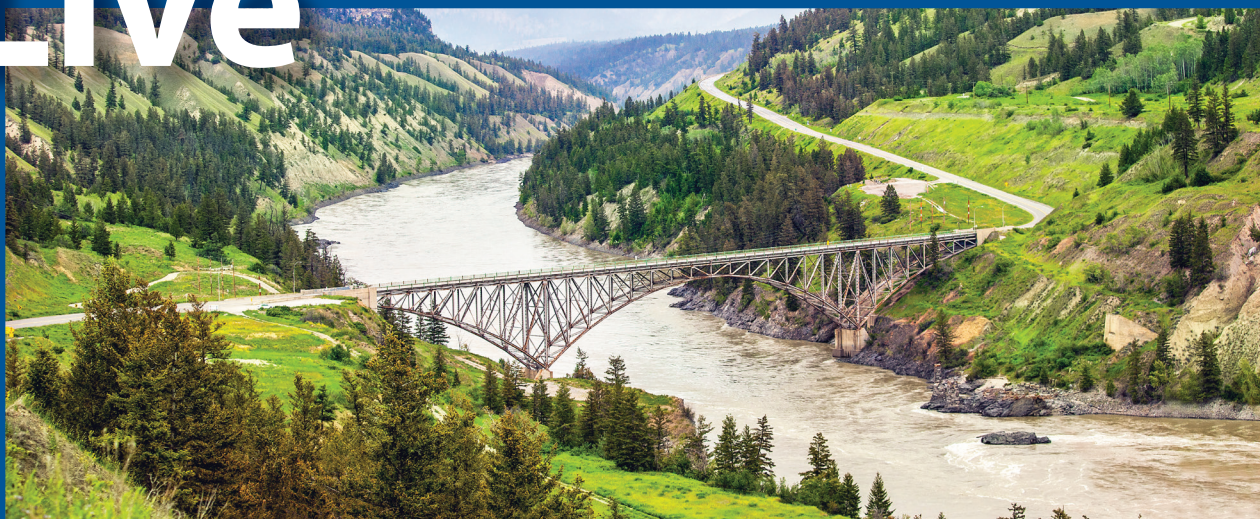

# Work

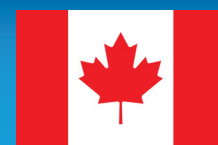

## Psychiatrist Opportunities in Beautiful Interior of British Columbia Trail, Nelson, Cranbrook, Williams Lake

*\*\*Urban opportunities are available in Psychiatry - please inquire and indicate your interest\*\**

# Play

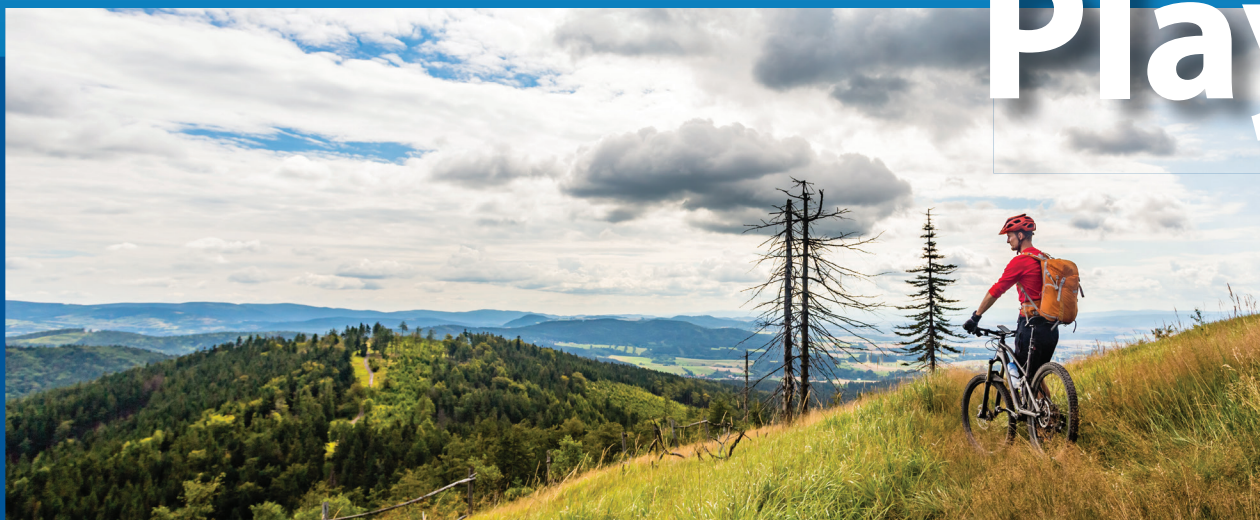

For more information & to apply contact:  
[Charlene.Thomas@InteriorHealth.ca](mailto:Charlene.Thomas@InteriorHealth.ca)

[www.betterhere.ca](http://www.betterhere.ca)

Inspiring better health, Inspiring a better you, it's better here
